# Supplementary material
Source: publisher figshare collection journal article supplement (https://acs.figshare.com/ndownloader/files/4185922)
Supplement: Supplementary file 1 [file 4185922]

# Supporting Information

for

## Temperature-Dependent Solid-State Electron Transport through Bacteriorhodopsin: Experimental Evidence for Multiple Transport Paths through Proteins

Lior Sepunaru,<sup>†‡</sup> Noga Friedman,<sup>‡</sup> Israel Pecht,<sup>§</sup> Mordechai Sheves,<sup>\*‡</sup> and David Cahen<sup>\*†</sup>

<sup>†</sup>Departments of Materials and Interfaces, <sup>‡</sup>Organic Chemistry, and <sup>§</sup>Immunology, Weizmann Institute of Science, POB 26, Rehovot 76100, Israel

\*To whom correspondence should be addressed :David Cahen; [David.Cahen@Weizmann.ac.il](mailto:David.Cahen@Weizmann.ac.il) Phone/Fax: +972-8-9342246/4138 Mailing Address: Perlman building Room 620, Weizmann Institute of Science, Rehovot, Israel  
Mordechai Sheves; [Mudi.Sheves@weizmann.ac.il](mailto:Mudi.Sheves@weizmann.ac.il) Phone/Fax: +972-8-9344320/3026 Mailing Address: organic Chemistry, Weizmann Institute of Science, Rehovot 76100, Israel.

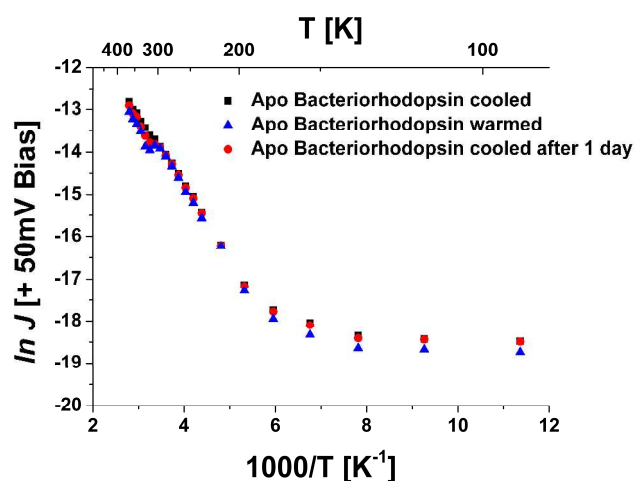

**Figure S1.**  $\ln$  (current density) - temperature plots for Apo bR monolayer junctions at +50 mV bias to the top electrode. Stable currents and temperature dependent reversibility was achieved upon cooling the sample (from high to low temperature) or heating (*vice versa*), and cooling back one day after the first set of measurements.

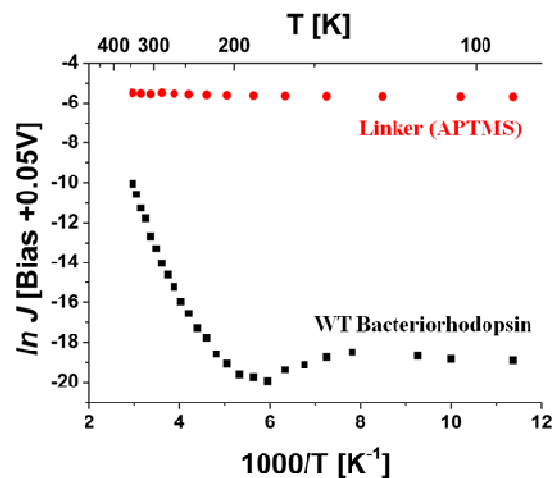

**Figure S2.**  $\ln(\text{current density})$  - temperature plots via 3-aminopropyl) trimethoxysilane, APTMS, and WT bR monolayer junctions at +50 mV bias to the top electrode.

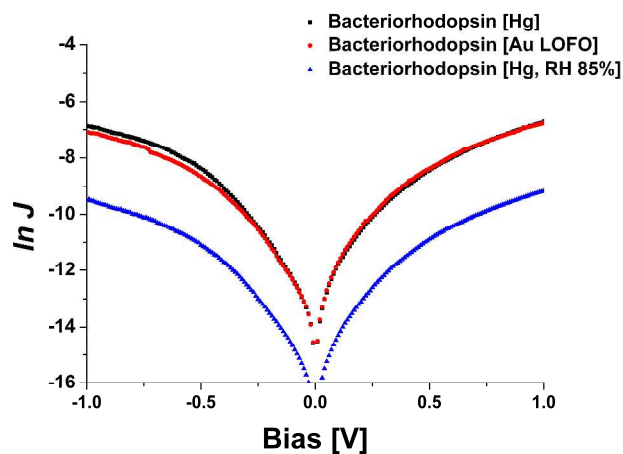

**Figure S3.**  $\ln(\text{current density})$  -applied bias plots of WT bR monolayer junctions at  $\pm 1$  V bias to the top electrode at room temperature. Junctions with Au LOFO contacts have similar currents to those made with a mercury electrode in 20% RH (red and black, top curves). Currents at RH=85% are smaller at room temperature, likely due to the addition of molecular water layer between the sample and the top electrode.

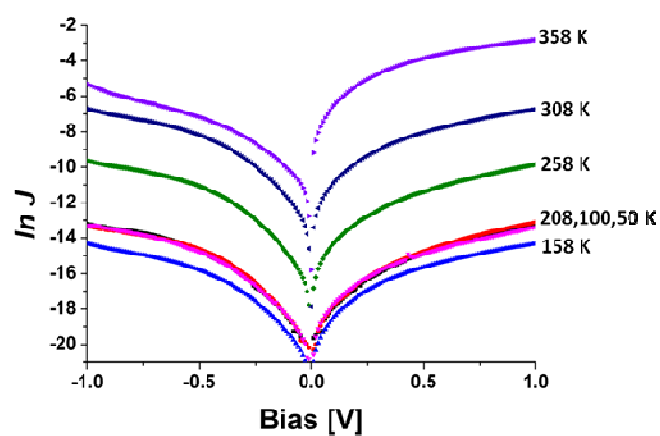

**Figure S4.**  $\ln(\text{current density})$  - applied bias plots of WT bR monolayer junctions at  $\pm 1$  V bias to the top electrode. Temperatures are given next to the plots.
